# Supplementary material for: Impacts of aerosol-photolysis interaction and aerosol-radiation feedback on surface-layer ozone in North China during a multi-pollutant air pollution episode
Source: Copernicus journal article supplement (doi:10.5194/acp-2021-119), 2021-03-02
Supplement: Supplementary file 1 [file acp-2021-119-supplement.pdf]

1 Supplementary Information for  
2  
3 **Impacts of aerosol-photolysis interaction and aerosol-radiation**  
4 **feedback on surface-layer ozone in North China during a**  
5 **multi-pollutant air pollution episode**

6

7 Hao Yang<sup>1</sup>, Lei Chen<sup>1</sup>, Hong Liao<sup>1</sup>, Jia Zhu<sup>1</sup>, Wenjie Wang<sup>2</sup>, Xin Li<sup>2</sup>

8

9 <sup>1</sup>Jiangsu Key Laboratory of Atmospheric Environment Monitoring and Pollution  
10 Control, Jiangsu Collaborative Innovation Center of Atmospheric Environment and  
11 Equipment Technology, School of Environmental Science and Engineering, Nanjing  
12 University of Information Science & Technology, Nanjing 210044, China

13 <sup>2</sup>State Joint Key Laboratory of Environmental Simulation and Pollution Control,  
14 College of Environmental Sciences and Engineering, Peking University, Beijing  
15 100871, China

16

17 **Correspondence:** Lei Chen (chenlei@nuist.edu.cn) and Hong Liao  
18 (hongliao@nuist.edu.cn)

1 **Table S1.** Locations of the three stations from NOAA's National Climatic Data Center  
2 used in this study.

| <b>Station</b> | <b>Latitude (°)</b> | <b>Longitude (°)</b> |
|----------------|---------------------|----------------------|
| <b>Beijing</b> | 40.08               | 116.585              |
| <b>Tianjin</b> | 39.1                | 117.167              |
| <b>Baoding</b> | 38.733              | 115.483              |

3

4

1 **Table S2.** Locations of the thirty-two stations from China National Environmental  
 2 Monitoring Center used in this study.

| <b>Station</b>    | <b>Latitude (°)</b> | <b>Longitude (°)</b> |
|-------------------|---------------------|----------------------|
| <b>Beijing_1</b>  | 39.8673             | 116.366              |
| <b>Beijing_2</b>  | 40.2865             | 116.17               |
| <b>Beijing_3</b>  | 39.9522             | 116.434              |
| <b>Beijing_4</b>  | 39.8745             | 116.434              |
| <b>Beijing_5</b>  | 39.9716             | 116.473              |
| <b>Beijing_6</b>  | 39.9425             | 116.361              |
| <b>Beijing_7</b>  | 39.9934             | 116.315              |
| <b>Beijing_8</b>  | 40.1438             | 116.72               |
| <b>Beijing_9</b>  | 40.3937             | 116.644              |
| <b>Beijing_10</b> | 40.1952             | 116.23               |
| <b>Beijing_11</b> | 40.0031             | 116.407              |
| <b>Beijing_12</b> | 39.9279             | 116.225              |
| <b>Tianjin_1</b>  | 39.097              | 117.151              |
| <b>Tianjin_2</b>  | 39.173              | 117.193              |
| <b>Tianjin_3</b>  | 39.1654             | 117.145              |
| <b>Tianjin_4</b>  | 39.1205             | 117.184              |
| <b>Tianjin_5</b>  | 39.1082             | 117.237              |
| <b>Tianjin_6</b>  | 39.0927             | 117.202              |
| <b>Tianjin_7</b>  | 39.2133             | 117.1837             |
| <b>Tianjin_8</b>  | 39.1337             | 117.269              |
| <b>Tianjin_9</b>  | 39.0877             | 117.307              |
| <b>Tianjin_10</b> | 39.0343             | 117.707              |
| <b>Tianjin_11</b> | 38.8394             | 117.457              |
| <b>Tianjin_12</b> | 39.124              | 117.401              |
| <b>Tianjin_13</b> | 39.1587             | 117.764              |
| <b>Tianjin_14</b> | 38.9194             | 117.157              |
| <b>Baoding_1</b>  | 38.8632             | 115.493              |
| <b>Baoding_2</b>  | 38.8957             | 115.5223             |
| <b>Baoding_3</b>  | 38.9108             | 115.4713             |
| <b>Baoding_4</b>  | 38.8416             | 115.4612             |
| <b>Baoding_5</b>  | 38.8756             | 115.442              |
| <b>Baoding_6</b>  | 38.8707             | 115.5214             |

3

4

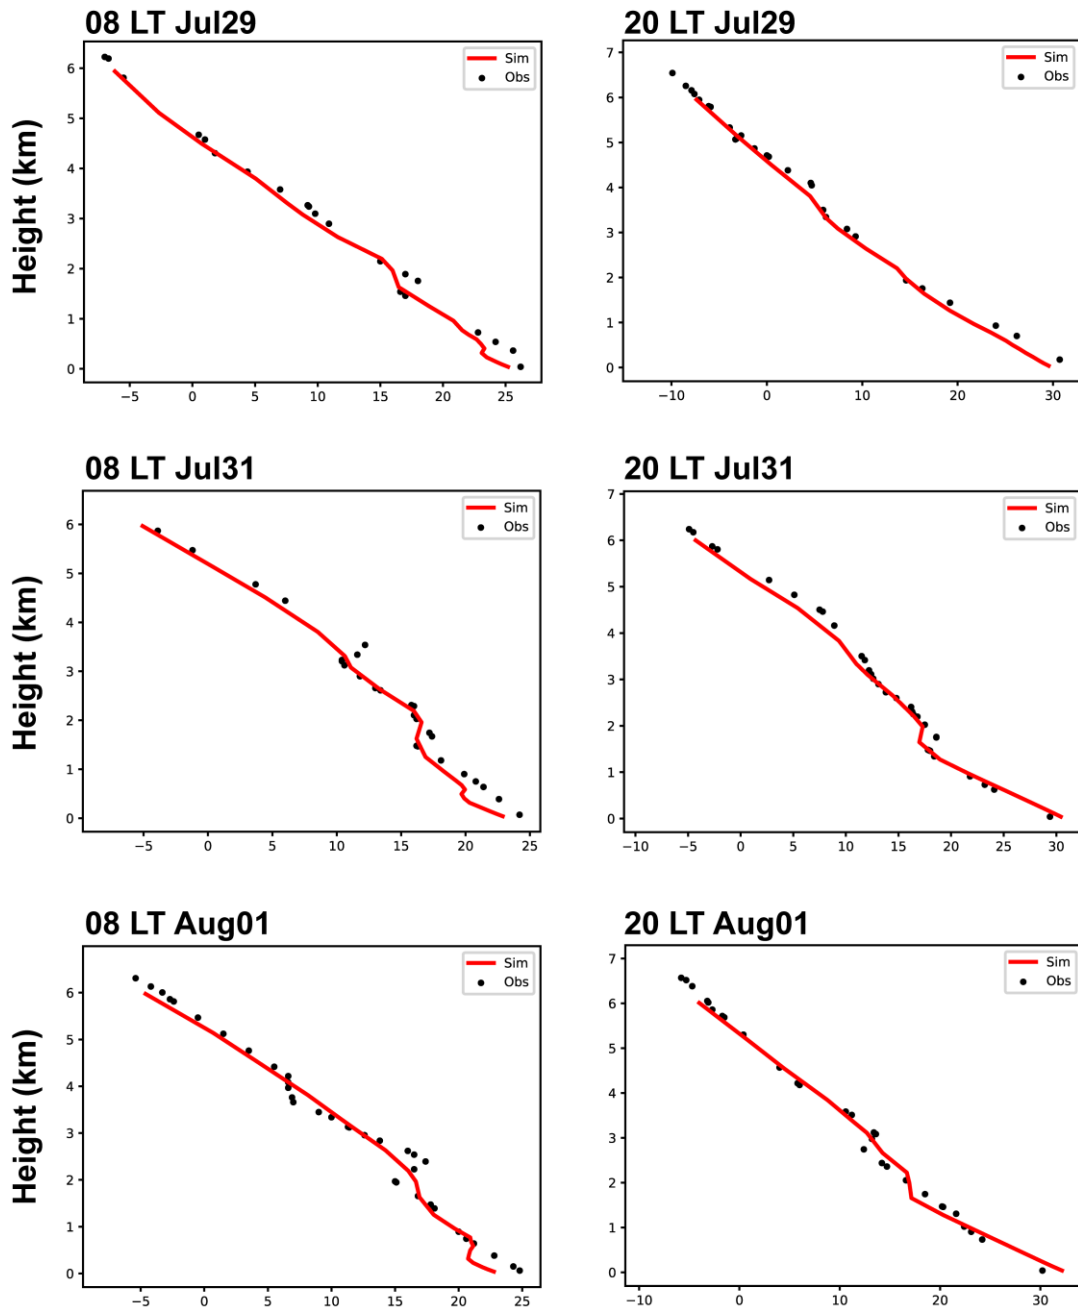

1

2 **Figure S1.** Observed (black dots) and simulated (red lines) temperature profiles in  
 3 Beijing (39.93°N, 116.28°E) at 08:00 and 20:00 LST on 29 July, 31 July, and 1  
 4 August 2014.

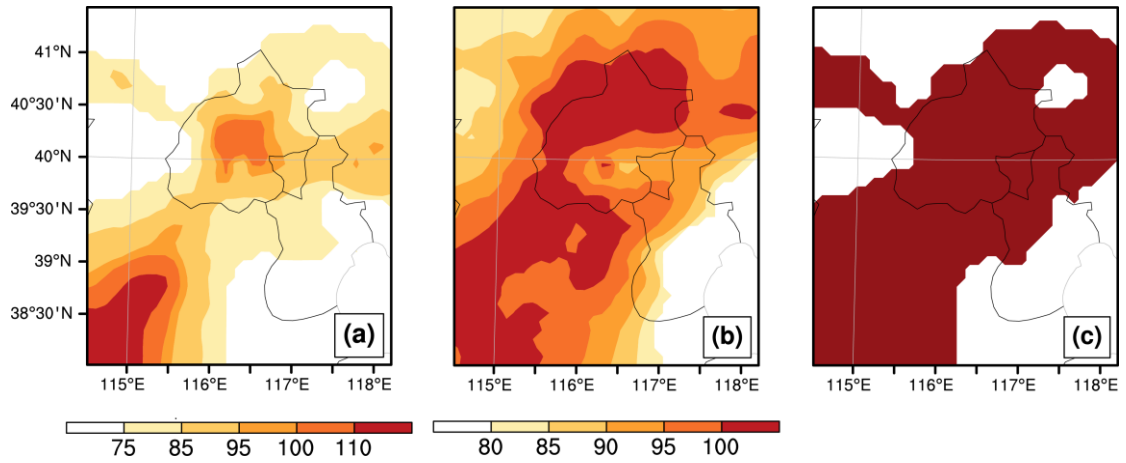

1

2 **Figure S2.** The spatial distributions of simulated (a) PM<sub>2.5</sub> (µg m<sup>-3</sup>) and (b) MDA8  
 3 O<sub>3</sub> (ppb) concentrations averaged during 28 July to 3 August 2014. (c) The defined  
 4 complex air pollution areas (CAPAs, shaded by red) where PM<sub>2.5</sub> and MDA8 O<sub>3</sub>  
 5 concentrations are larger than 75 µg m<sup>-3</sup> and 80 ppb, respectively.

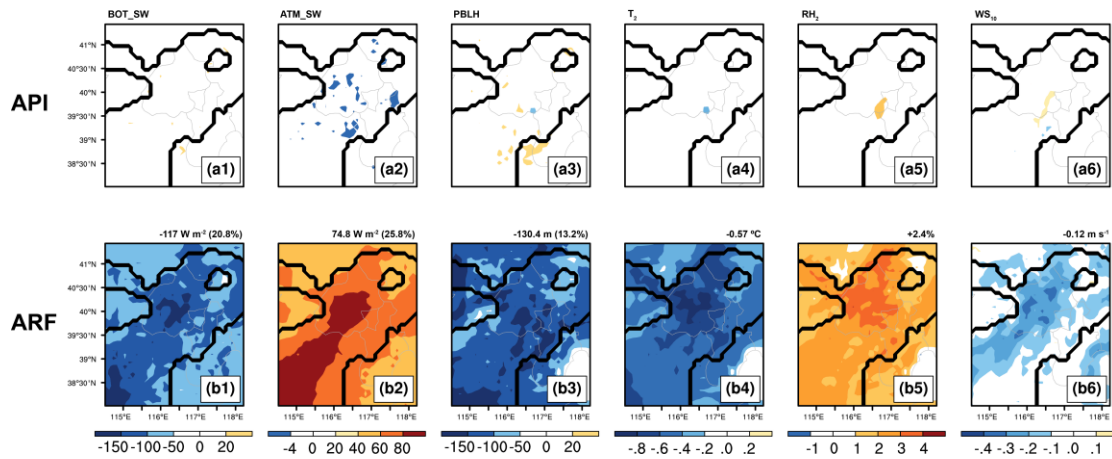

1

2 **Figure S3.** Changes in downward shortwave radiation at the surface (BOT\_SW),  
 3 downward shortwave radiation in the atmosphere (ATM\_SW), PBL height (PBLH),  
 4 2-m temperature ( $T_2$ ), 2-m relative humidity ( $RH_2$ ), and 10-m wind speed ( $WS_{10}$ )  
 5 caused by (a) API and (b) ARF during the daytime (08:00-17:00 LST) from 28 July to  
 6 3 August 2014. The calculated changes averaged over CAPAs are also shown at the  
 7 top of each panel.

8

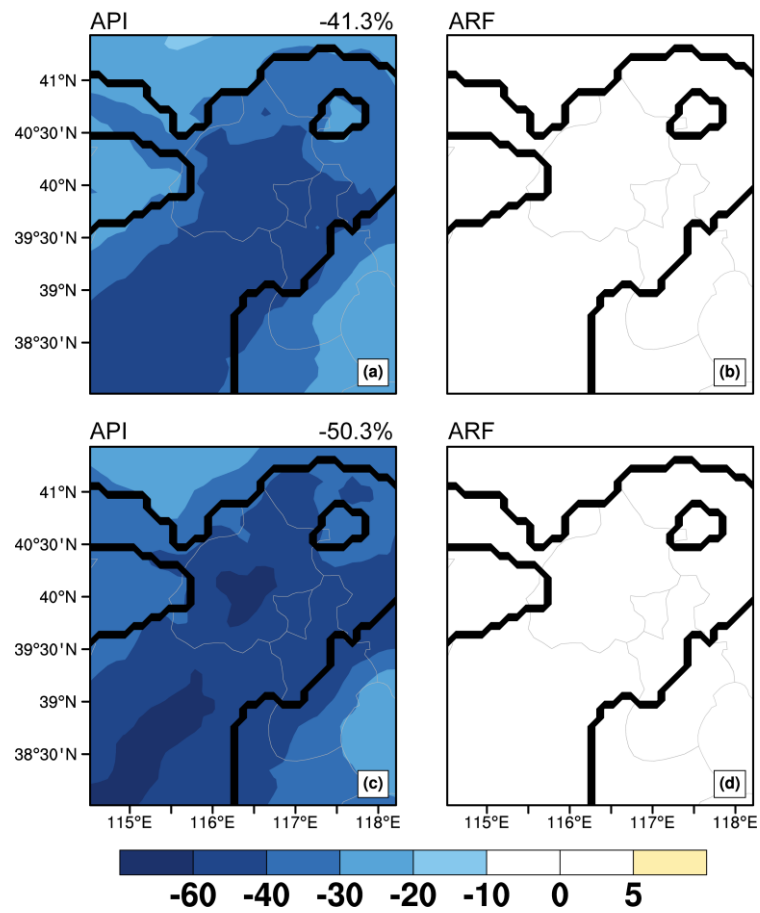

1

2 **Figure S4.** Percentage changes in (a-b)  $J[\text{NO}_2]$  and (c-d)  $J[\text{O}^1\text{D}]$  caused by API and  
 3 ARF during the daytime (08:00-17:00 LST) from 28 July to 3 August 2014. The  
 4 calculated changes averaged over CAPAs are also shown at the top of each panel.

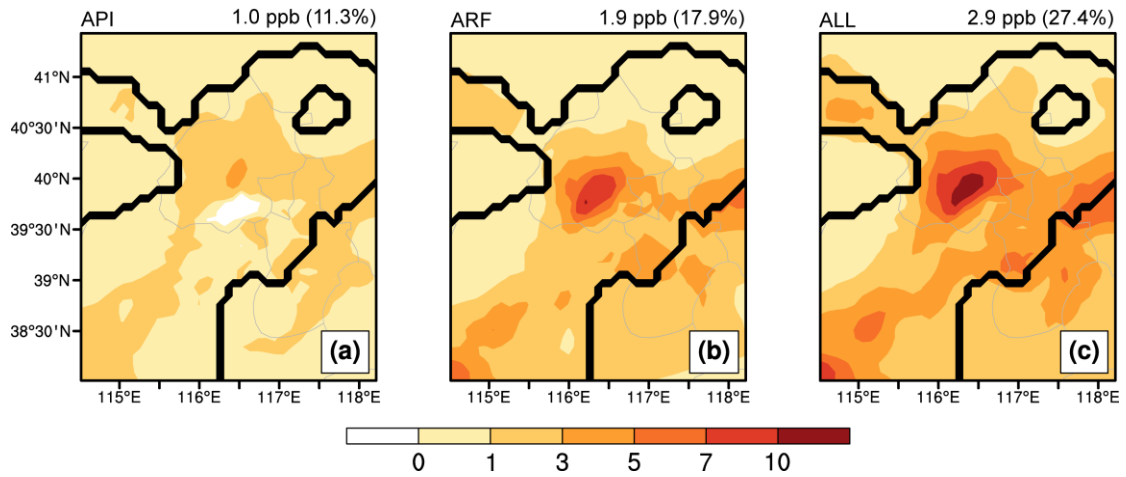

1

2 **Figure S5.** The changes in simulated surface-layer concentrations of NO<sub>x</sub> (NO<sub>2</sub>+NO,  
 3 ppb) caused by (a) API, (b) ARF, and (c) ALL during the daytime (08:00-17:00 LST)  
 4 from 28 July to 3 August 2014. The calculated changes averaged over CAPAs are also  
 5 shown at the top of each panel.

6



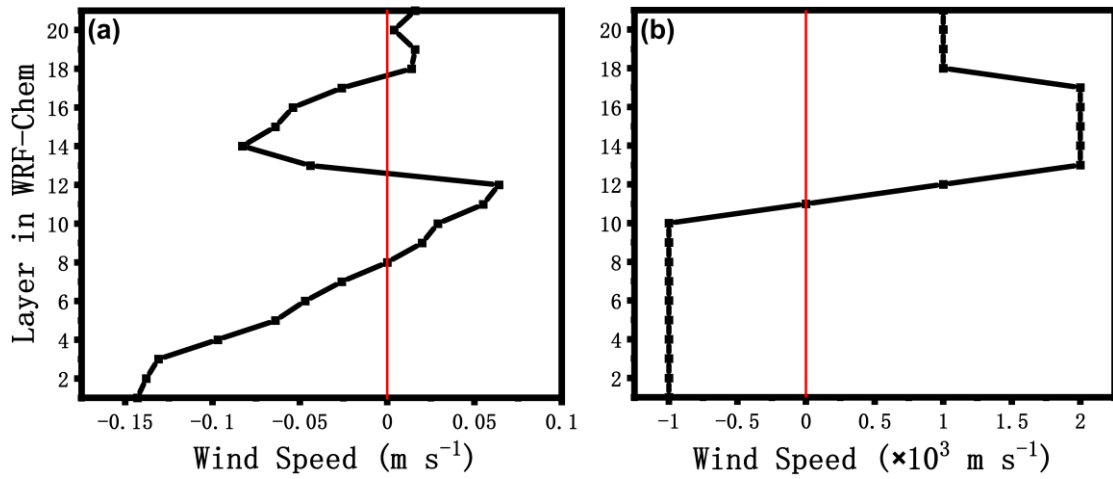

1

2 **Figure S6.** The impacts of ARF on (a) horizontal and (b) vertical wind speed in  
 3 different model layers averaged over CAPAs during the daytime (08:00-17:00 LST)  
 4 from 28 July to 3 August 2014.
